# Supplementary material for: A Novel Tree Shrew Model of Chronic Experimental Autoimmune Uveitis and Its Disruptive Application
Source: PubMed Central journal article supplement (PMC9196886; doi:10.3389/fimmu.2022.889596), 2022-05-27
Supplement: DataSheet_1.pdf [file DataSheet_1.pdf]

## *Supplementary Material*

### Supplementary Tables

**TABLE S1. Primers used for verification of DEGs by q-PCR**

| Gene         | sequence                                         | PCR Products (bp) |
|--------------|--------------------------------------------------|-------------------|
| <i>Actin</i> | Forward sequence (5'-3'): CCCAGTCCTCACCCAAATACA  | 183               |
|              | Reverse sequence (5'-3'): GGGAGACCATAAGCCTTCATAC |                   |
| <i>RGS4</i>  | Forward sequence (5'-3'): GCTGCGAAACGAAGACACC    | 139               |
|              | Reverse sequence (5'-3'): ACGGAAAGGGATGCTGATG    |                   |
| <i>KIF1B</i> | Forward sequence (5'-3'): GTAGCCCCTGCCGGAATT     | 198               |
|              | Reverse sequence (5'-3'): CGAGACACGCTCAGCACTCT   |                   |
| <i>P2RY2</i> | Forward sequence (5'-3'): TACTACTCCTTCCGCTCACTCA | 103               |
|              | Reverse sequence (5'-3'): CCAGGCAACTGTTGGCACT    |                   |
| <i>SYBU</i>  | Forward sequence (5'-3'): AGGAGGTCACGGAGGAGGG    | 139               |
|              | Reverse sequence (5'-3'): CCAGGGGTGGAATGAACAAA   |                   |

**TABLE S2. The pathway enrichment of differently expressed genes (DEGs) in the BR14 group**

| Description                                      | Category           | P-adjust | Gene name                                                                                                                                   |
|--------------------------------------------------|--------------------|----------|---------------------------------------------------------------------------------------------------------------------------------------------|
| Bacterial invasion of epithelial cells           | Human Diseases     | 0.000265 | XLOC_020866, MAPK15, XLOC_048568, XLOC_050538, XLOC_050836, XPNPEP1, PDLIM4, RBM26, SEPT9, ELMO2, DOCK1, CAV1, SRC                          |
| Inflammatory mediator regulation of TRP channels | Organismal Systems | 0.000572 | XLOC_003642, STX16, SNTA1, PPP6R2, XLOC_050538, LOC102483497, P2RY2, ADCY6, ITPR3, PRKCD, SRC, ADCY4                                        |
| Estrogen signaling pathway                       | Organismal Systems | 0.000572 | XLOC_003642, STX16, GADD45G, XLOC_050538, FRMD4B, LOC102483497, ATF6B, ADCY6, GABBR1, ITPR3, ATF6B, PRKCD, SRC, ADCY4, NOS3                 |
| Gap junction                                     | Cellular Processes | 0.000951 | XLOC_003642, STX16, ZGRF1, LOC102483497, TRPM1, ADCY6, LOC102496850, ITPR3, SRC, ADCY4, MAP2K5                                              |
| Platelet activation                              | Organismal Systems | 0.001556 | XLOC_003642, STX16, PPP6R2, XLOC_050538, XLOC_050836, LOC102483497, ARHGEF1, COL1A1, CYTH3, ITPR3, SRC, ADCY4, NOS3                         |
| Focal adhesion                                   | Cellular Processes | 0.002684 | XLOC_020866, MAPK15, XLOC_048568, XLOC_050538, XLOC_050836, XLOC_061360, XLOC_061360, NA, ABCA4, CRYBA2, RBM26, LAMB3, COL1A1, DOCK1, CAV1, |

|                                       |                                      |          |                                                                                                                                                                                                                                               |
|---------------------------------------|--------------------------------------|----------|-----------------------------------------------------------------------------------------------------------------------------------------------------------------------------------------------------------------------------------------------|
| Endocrine resistance                  | Human Diseases                       | 0.004674 | SRC, FLT4, PAK6<br>XLOC_003642, STX16, MAPK15, PPP6R2,<br>XLOC_050538, LOC106736342,<br>LOC102483497, ADCY6, SRC, ADCY4, MDM2                                                                                                                 |
| GnRH signaling pathway                | Organismal Systems                   | 0.004674 | XLOC_003642, STX16, PPP6R2,<br>LOC102483497, ADCY6, PRKCD, ITPR3, SRC,<br>ADCY4, MAP2K4                                                                                                                                                       |
| Phospholipase D signaling pathway     | Environmental Information Processing | 0.004674 | XLOC_003642, STX16, XLOC_012724, SNTA1,<br>XLOC_050538, XPNPEP1, ZGRF1,<br>LOC102483497, RALGDS, RALGDS, CYTH3,<br>ADCY6, RAPGEF3, CYTH3, ADCY4<br>ATP5ME, XLOC_020866, MAPK15,<br>XLOC_036533, XLOC_048568, XLOC_050538,                     |
| Regulation of actin cytoskeleton      | Cellular Processes                   | 0.006887 | XLOC_050836, CDC16, XLOC_061360,<br>ZGRF1, RBM26, XLOC_086978, ARHGEF1,<br>ACTN1, DOCK1, SRC, PAK6                                                                                                                                            |
| Rap1 signaling pathway                | Environmental Information Processing | 0.008449 | XLOC_003642, STX16, ACO1, SNTA1,<br>PPP6R2, XLOC_050538, XLOC_050836,<br>ZGRF1, LOC102483497, XLOC_086978,<br>RALGDS, RALGDS, ADCY6, RAPGEF3, SRC,<br>ADCY4, FLT4                                                                             |
| Pathways in cancer                    | Human Diseases                       | 0.011204 | XLOC_003642, HERC1, STX16, NXPE3,<br>SNTA1, MAPK15, XLOC_048568,<br>XLOC_050538, XLOC_050836, ZGRF1,<br>ABCA4, LOC102483497, XLOC_086978,<br>EGLN2, ARHGEF1, MECOM, SPI1, LAMB3,<br>RALGDS, RALGDS, ABL1, GNGT2, ADCY6,<br>ADCY4, AXIN2, MDM2 |
| Phosphatidylinositol signaling system | Environmental Information Processing | 0.011361 | XLOC_012724, SNTA1, OSBP2,<br>XLOC_050538, PTPRM, INPP4A, CDIPT,<br>ITPR3                                                                                                                                                                     |
| ErbB signaling pathway                | Environmental Information Processing | 0.021818 | SNTA1, MAPK15, XLOC_050538,<br>XLOC_061360, ZGRF1, ABL1, SRC, PAK6,<br>MAP2K4                                                                                                                                                                 |
| Amoebiasis                            | Human Diseases                       | 0.021818 | STX16, MAPK15, XLOC_048568,<br>XLOC_050538, LOC102483497, RBM26,<br>ACTN1, LAMB3, COL1A1                                                                                                                                                      |
| Vascular smooth muscle contraction    | Organismal Systems                   | 0.025525 | XLOC_003642, STX16, LOC102483497,<br>ARHGEF1, COL1A1, ADCY6, ITPR3, SRC,<br>ADCY4, NOS3                                                                                                                                                       |
| HIF-1 signaling pathway               | Environmental                        | 0.027712 | ACO1, SNTA1, CHMP6, XLOC_050538,<br>ZGRF1, LSAMP, EGLN2, SERPINE1, NOS3                                                                                                                                                                       |

|                                                           |                                      |          |  |                                                                                                                                                                                |
|-----------------------------------------------------------|--------------------------------------|----------|--|--------------------------------------------------------------------------------------------------------------------------------------------------------------------------------|
|                                                           | Information Processing               |          |  |                                                                                                                                                                                |
| Shigellosis                                               | Human Diseases                       | 0.027712 |  | XLOC_020866, PPP6R2, XLOC_050836, RBM26, ELMO2, ABL1, DOCK1, SRC                                                                                                               |
| Adherens junction                                         | Cellular Processes                   | 0.030368 |  | XLOC_036533, BCAN, AGRN, TRPM1, RBM26, XLOC_086978, ACTN1, SRC                                                                                                                 |
| PI3K-Akt signaling pathway                                | Environmental Information Processing | 0.033711 |  | MAPK15, HECTD1, GADD45G, XLOC_048568, XLOC_050538, XLOC_050836, STX10, NA, CRYBA2, XLOC_086978, SGK1, ATF6B, LAMB3, GNGT2, COL1A1, ATF6B, MDM2, TEDC2, ACO1, FLT4, NOS3, ZGRF1 |
| Gastric acid secretion                                    | Organismal Systems                   | 0.034481 |  | XLOC_003642, STX16, GALNT11, LOC102483497, ADCY6, ITPR3, ADCY4                                                                                                                 |
| Axon guidance                                             | Organismal Systems                   | 0.034511 |  | HEPACAM, SNTA1, MAPK15, PPP6R2, XLOC_050538, XLOC_050836, LOC102492209, XLOC_061360, NDST4, ABL1, SRC, PAK6                                                                    |
| VEGF signaling pathway                                    | Environmental Information Processing | 0.042375 |  | SNTA1, MAPK15, PPP6R2, XLOC_050538, SRC, NOS3                                                                                                                                  |
| Thyroid hormone synthesis                                 | Organismal Systems                   | 0.042375 |  | XLOC_003642, STX16, GADD45G, LOC102483497, ATF6B, ADCY6, ITPR3, ADCY4                                                                                                          |
| Oxytocin signaling pathway                                | Organismal Systems                   | 0.042375 |  | XLOC_003642, STX16, LOC102483497, LOC102501927, ADCY6, ITPR3, NPR2, SRC, ADCY4, NOS3, MAP2K5                                                                                   |
| Salivary secretion                                        | Organismal Systems                   | 0.047261 |  | XLOC_003642, STX16, GALNT11, LOC102483497, ADCY6, ITPR3, ADCY4                                                                                                                 |
| Endocrine and other factor-regulated calcium reabsorption | Organismal Systems                   | 0.047261 |  | XLOC_003642, STX16, RUVBL2, XPNPEP1, ADCY6                                                                                                                                     |
| cGMP-PKG signaling pathway                                | Environmental Information Processing | 0.049559 |  | XLOC_003642, GADD45G, XLOC_041871, BAZ1B, LOC102483497, LOC102501927, GTF2I, ADCY6, ITPR3, ATF6B, NPR2, ADCY4, NOS3                                                            |

**TABLE S3. The pathway enrichment of differently expressed genes (DEGs) in the IRBP<sub>1197-1211</sub> group**

| Description            | Category                  | P_value        | P_adjust        | Gene name                                                                  |
|------------------------|---------------------------|----------------|-----------------|----------------------------------------------------------------------------|
| AMPK signaling pathway | Environmental Information | 0.0004952<br>9 | 0.1312517<br>77 | ADAM23, TAF15, WDR45, WTIP, KMT2C, XLOC_053484, LOC102475736, XLOC_061060, |

|                                        |                                      |           |           |                                                                                                                                                               |
|----------------------------------------|--------------------------------------|-----------|-----------|---------------------------------------------------------------------------------------------------------------------------------------------------------------|
|                                        | Processing                           |           |           | SLC10A1, CREB3L2, LIPE                                                                                                                                        |
| Methane metabolism                     | Metabolism                           | 0.0024798 | 0.3285847 | LOC102501767, BCL7C, CHMP6, WDR45                                                                                                                             |
| Mitophagy–yeast                        | Cellular Processes                   | 0.0040579 | 0.3584509 | LOC102488698, MAN2A2, XLOC_081167, LETM1                                                                                                                      |
| Phosphonate and phosphinate metabolism | Metabolism                           | 0.0149637 | 0.8928134 | MCRIP1, XLOC_027781                                                                                                                                           |
| Glycerophospholipid metabolism         | Metabolism                           | 0.0174254 | 0.8928134 | LPIN1, XLOC_007834, MCRIP1, PLA2G15, PLA2G4F, LCLAT1, XLOC_027781                                                                                             |
| Protein digestion and absorption       | Organismal Systems                   | 0.0243459 | 0.8928134 | SLC8A1, LOC102474421, COL4A3, RHPN1, DNPEP, COL7A1                                                                                                            |
| MAPK signaling pathway–fly             | Environmental Information Processing | 0.0284117 | 0.8928134 | FRYL, STRN4, STS, XLOC_023302, TEC, MAP2K4, PTPN11, SRC                                                                                                       |
| Biosynthesis of secondary metabolites  | Metabolism                           | 0.0310520 | 0.8928134 | LPIN1, XLOC_007834, NFX1, LOC102501767, LOC102491763, PLA2G4F, LCLAT1, CHMP6, LOC102495698, XLOC_027781, LOC102480703, SERTAD2, TAF15, WDR45, FDPS, OGDH, MVD |
| Spliceosome                            | Genetic Information Processing       | 0.0399023 | 0.8928134 | XLOC_035902, CDK10, DDX5, PQBP1, SLU7, GSKIP, XLOC_063251, XLOC_066578, LZTS3, LOC102469433,                                                                  |
| Carbon metabolism                      | Metabolism                           | 0.0440575 | 0.8928134 | NFX1, LOC102501767, BCL7C, CHMP6, SERTAD2, WDR45, OGDH                                                                                                        |

## SUPPLEMENTARY FIGURE LEGENDS

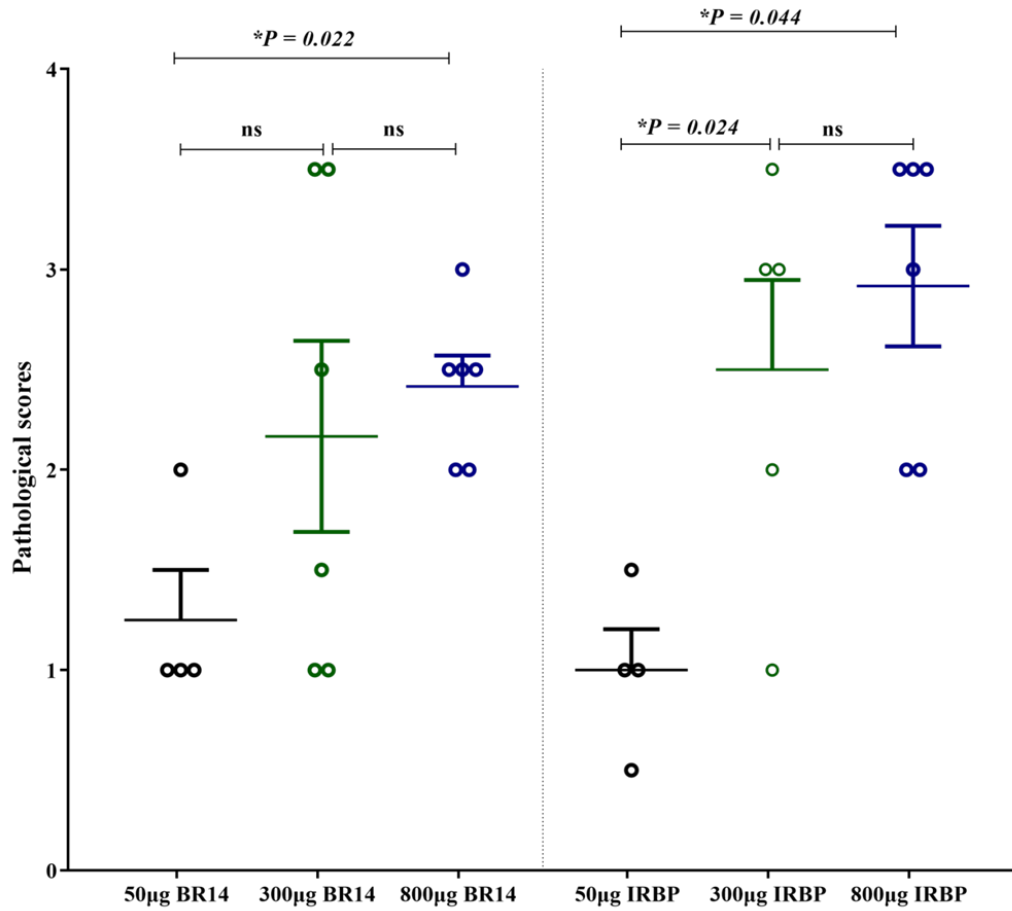

### SUPPLEMENTARY FIGURE 1 Histopathological of tree shrew EAU induced by R14 or IRBP<sub>1197-1211</sub>

Histopathological scores of the inflammatory peak in 50-µg-induced EAU were lower than those in 800-µg-induced EAU with BR14 and in 300-µg-induced and 800-µg-induced EAU with IRBP<sub>1197-1211</sub>.

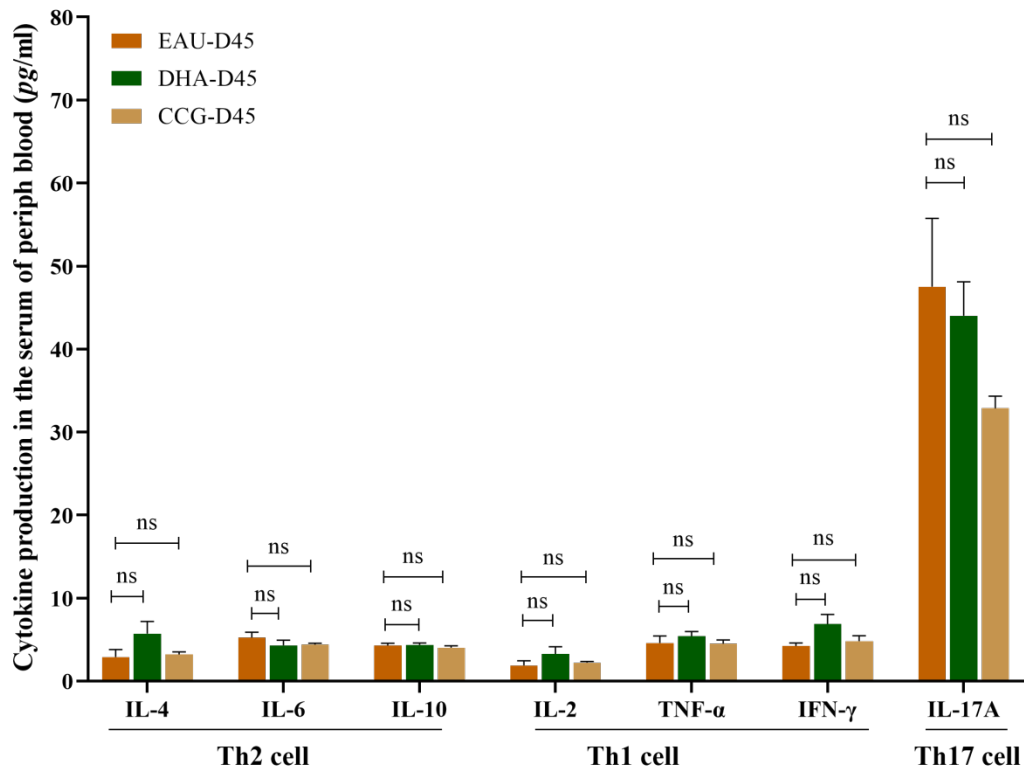

**SUPPLEMENTARY FIGURE 2 Cytokine production after treatment with CCG 203769 and DHA**

There was no significant change in the profiles of Th2 signature cytokines, Th1 signature cytokines, and Th17 signature cytokine in the serum of 800- $\mu$ g-IRBP<sub>1197-1211</sub>-induced EAU after treatment with CCG 203769 and DHA on day 45.
